# Supplementary material
Source: publisher figshare collection journal article supplement (https://acs.figshare.com/ndownloader/files/3901039)
Supplement: Supplementary file 1 [file 3901039]

# Supporting information for

## Enhanced *In Vivo* Antitumor Efficacy of Doxorubicin Encapsulated within Laponite Nanodisks

*Kai Li,<sup>a,1</sup> Shige Wang,<sup>b,1</sup> Shihui Wen,<sup>c</sup> Yueqin Tang,<sup>d</sup> Jipeng Li,<sup>a</sup> Xiangyang Shi,<sup>b,c\*</sup> and Qinghua Zhao<sup>a\*</sup>*

<sup>a</sup> Department of orthopaedics, Shanghai First People's Hospital, School of Medicine, Shanghai Jiao Tong University, Shanghai 200080, China.

<sup>b</sup> State Key Laboratory for Modification of Chemical Fibers and Polymer Materials, Donghua University, Shanghai 201620, China.

<sup>c</sup> College of Chemistry, Chemical Engineering and Biotechnology, Donghua University, Shanghai 201620, China.

<sup>d</sup> Experiment Center, Shanghai First People's Hospital, School of Medicine, Shanghai Jiao Tong University, Shanghai 200080, China.

**Table S1.** Blood routine parameters of mice at days 7 and 14 post treatment with saline, LAP, LAP/DOX, and free DOX.

|         | Hb (g/L) |      | WBC ( $\times 10^9/L$ ) |      | PLT ( $\times 10^{12}/L$ ) |      |
|---------|----------|------|-------------------------|------|----------------------------|------|
|         | d 7      | d 14 | d 7                     | d 14 | d 7                        | d 14 |
| Saline  | 145      | 131  | 4.98                    | 4.62 | 1.28                       | 1.30 |
| LAP     | 142      | 131  | 4.23                    | 4.23 | 1.25                       | 1.25 |
| LAP/DOX | 136      | 132  | 4.17                    | 4.30 | 1.23                       | 1.23 |
| DOX     | 133      | 115  | 2.71                    | 1.92 | 1.17                       | 0.42 |

**Table S2.** Serum biochemistry parameters of mice at days 7 and 14 post treatment with saline, LAP, LAP/DOX, and free DOX.

|         | AST (U/L) |      | ALT(U/L) |      | Total Bilirubin (umol/L) |      | Creatinine (umol/L) |      | Carbamide (umol/L) |      |
|---------|-----------|------|----------|------|--------------------------|------|---------------------|------|--------------------|------|
|         | d 7       | d 14 | d 7      | d 14 | d 7                      | d 14 | d 7                 | d 14 | d 7                | d 14 |
| Saline  | 111       | 105  | 35       | 39   | 5.7                      | 5.6  | 18                  | 17   | 7.8                | 7.8  |
| LAP     | 117       | 102  | 29       | 29   | 5.9                      | 5.9  | 13                  | 10   | 7.1                | 7.3  |
| LAP/DOX | 113       | 112  | 33       | 35   | 5.9                      | 5.9  | 20                  | 18   | 6.6                | 6.5  |
| DOX     | 139       | 159  | 50       | 63   | 9.2                      | 9.9  | 22                  | 28   | 6.8                | 9.1  |

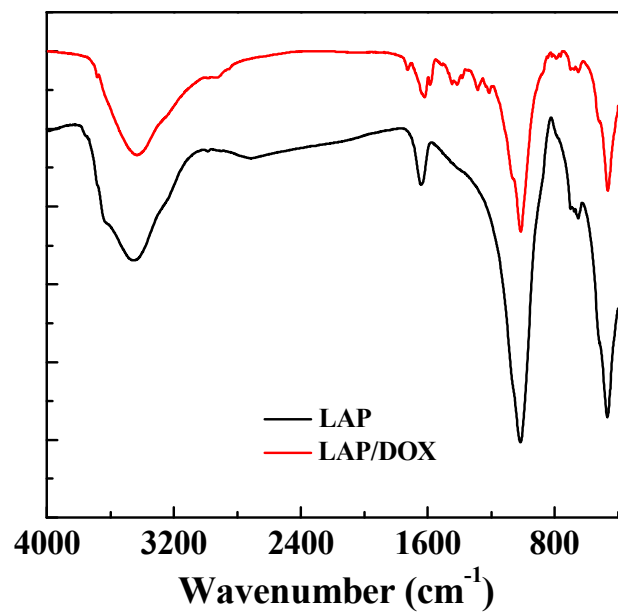

**Figure S1.** FTIR spectra of LAP and LAP/DOX nanodisks.

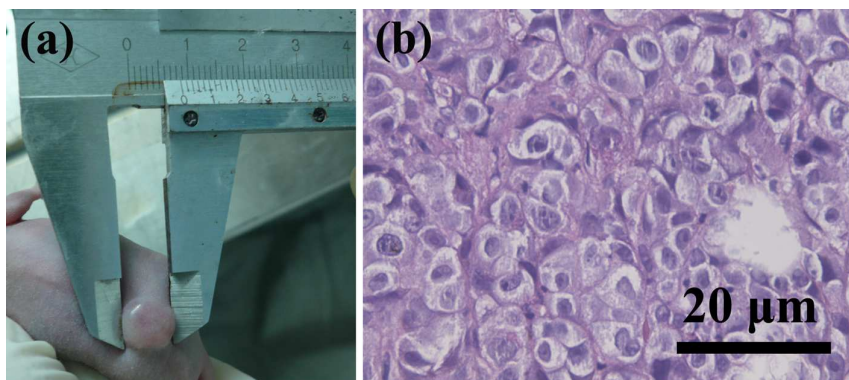

**Figure S2.** (a) Representative photos of KB tumor bearing mice before treatment (noted as day 0).

(b) HE staining showing the morphology of the KB cancer cells.

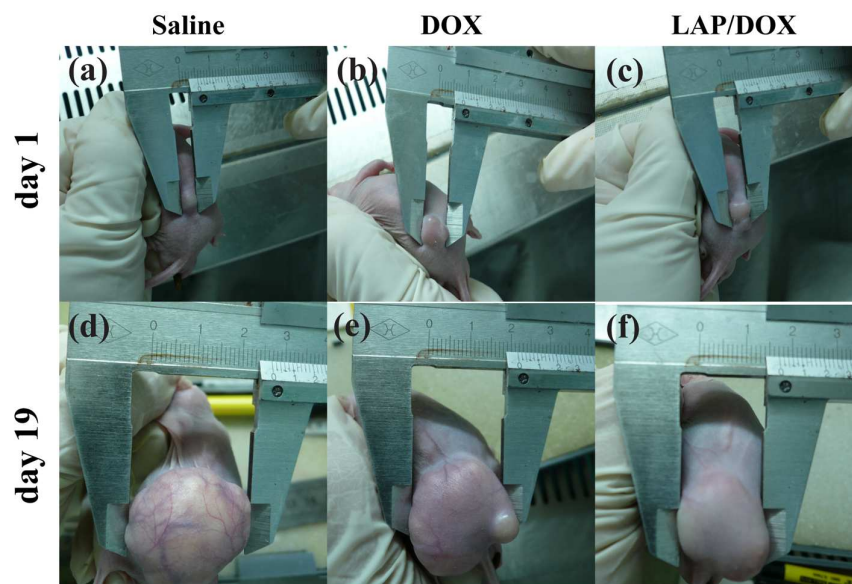

**Figure S3.** Representative photos of KB tumor bearing mice after various treatments at day 1 and day 19.

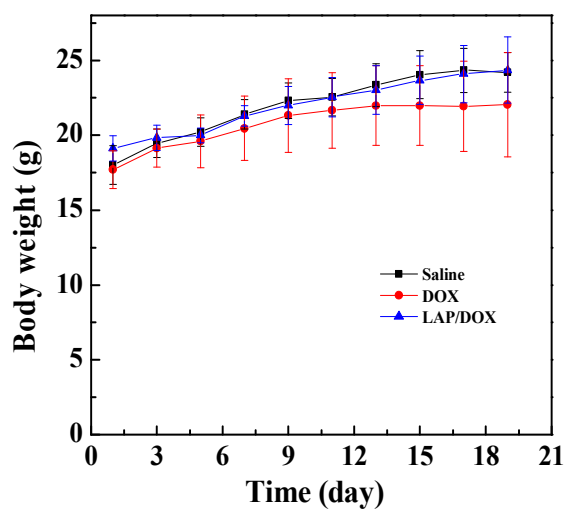

**Figure S4.** Body weight curves of KB tumor bearing mice after treatments with saline, free DOX, and LAP/DOX complexes (Mean  $\pm$  SD, n = 6).
